# Supplementary figures and images for: The origins of apicomplexan sequence innovation
Source: HighWire-hosted journal article supplement (doi:10.1101/gr.083386.108), 2009-04-10

Functional Categories

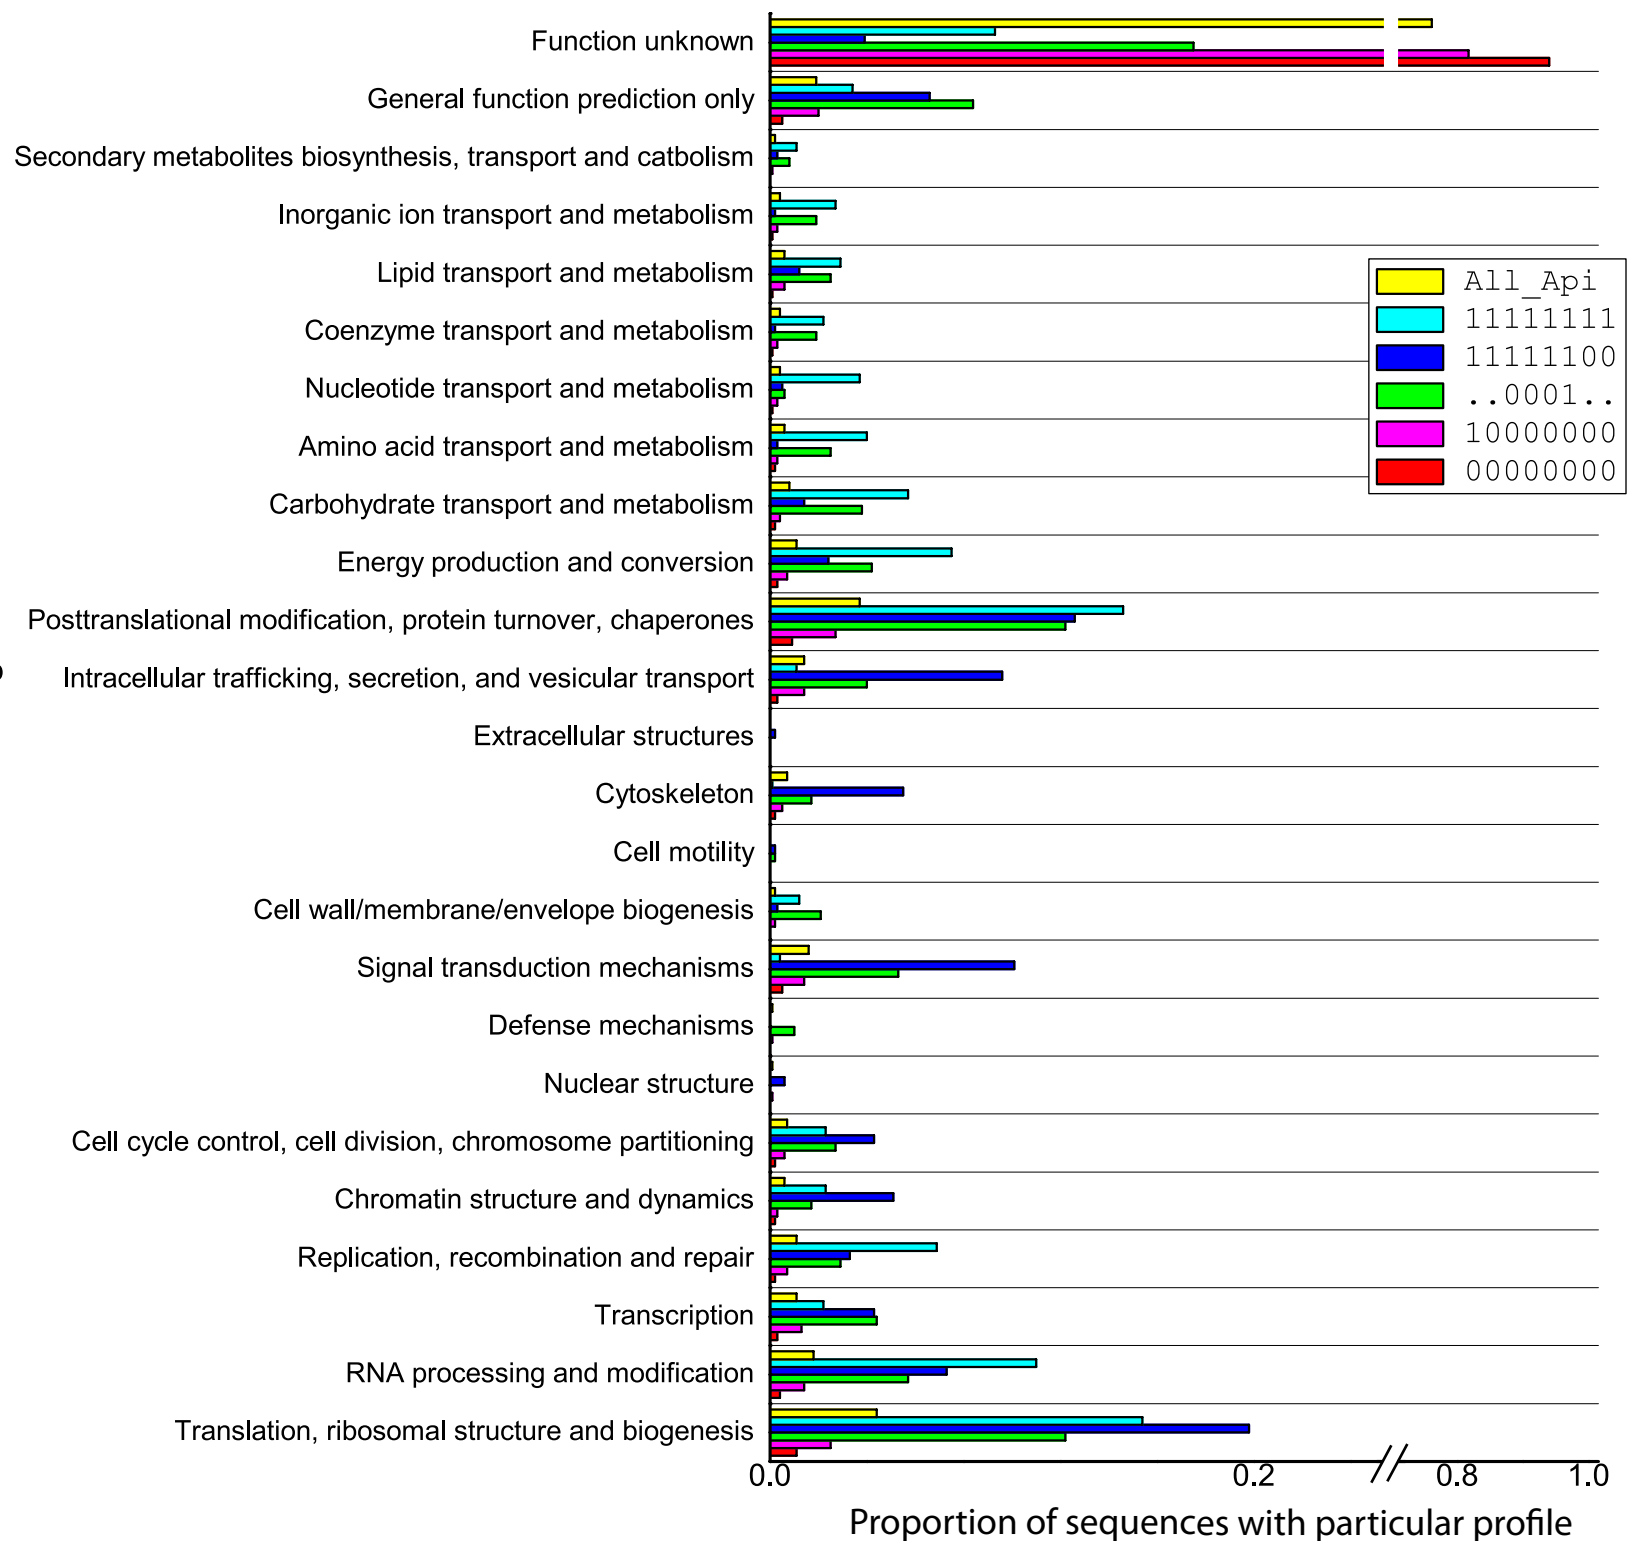

Supplement: FigS1.pdf [file FigS1.pdf]
